# Supplementary material for: Droplet Digital PCR Analysis of Liquid Biopsy Samples Unveils the Diagnostic Role of hsa-miR-133a-3p and hsa-miR-375-3p in Oral Cancer
Source: MDPI journal article supplement (doi:10.3390/biology9110379), 2020-11-06
Supplement: s1 [file s1]

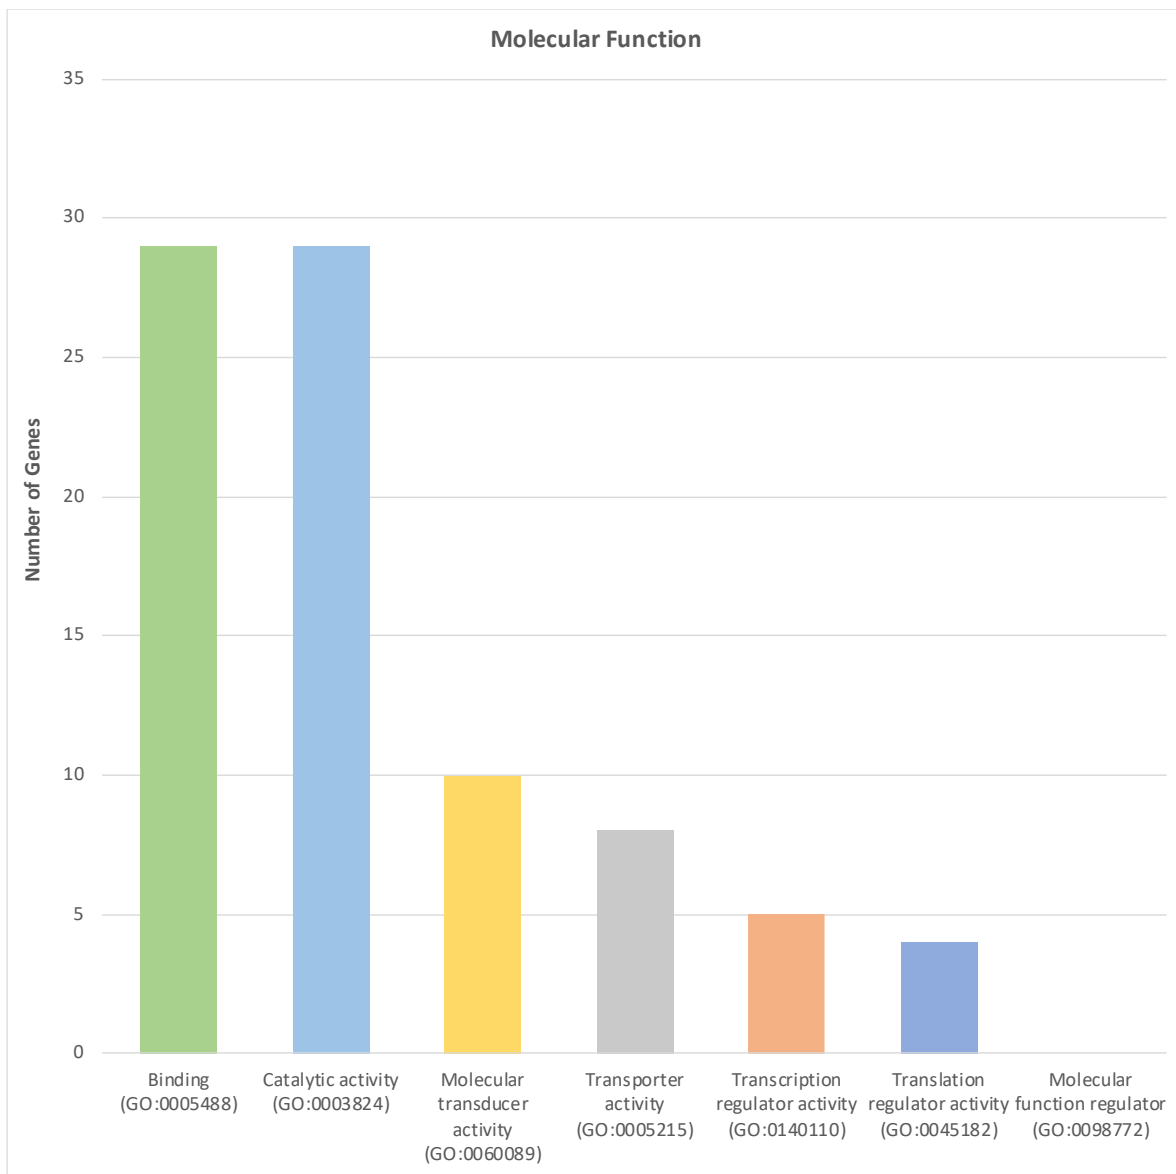

**Figure S1.** “Molecular Function” GO enrichment of the 147 miRNA-targeted genes identified through miRCancerdb.

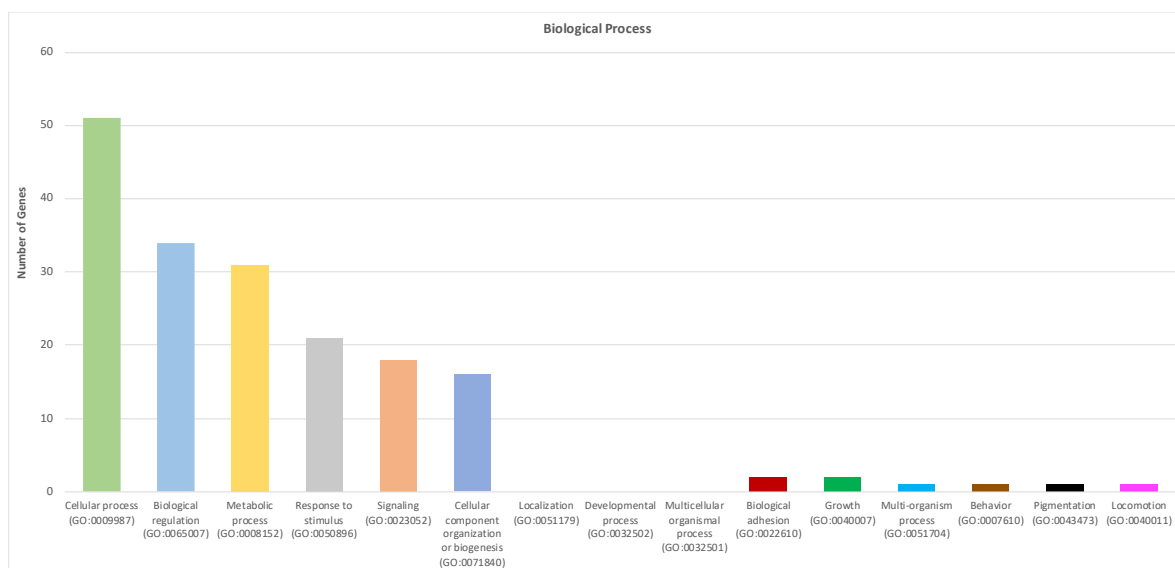

**Figure S2.** “Biological Process” GO enrichment of the 147 miRNA-targeted genes identified through miRCancerdb.

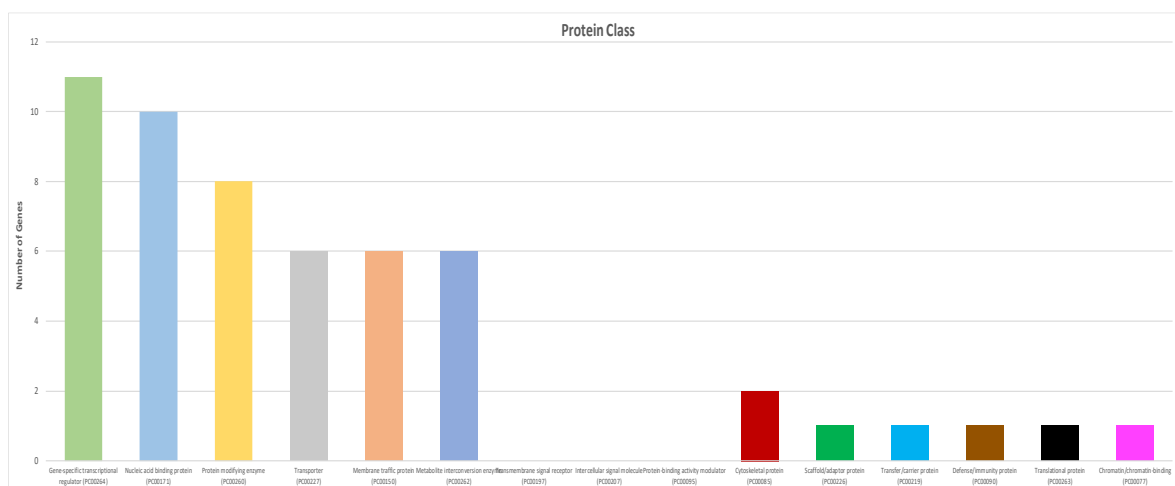

**Figure S3.** “Protein Class” GO enrichment of the 147 miRNA-targeted genes identified through miRCancerdb.

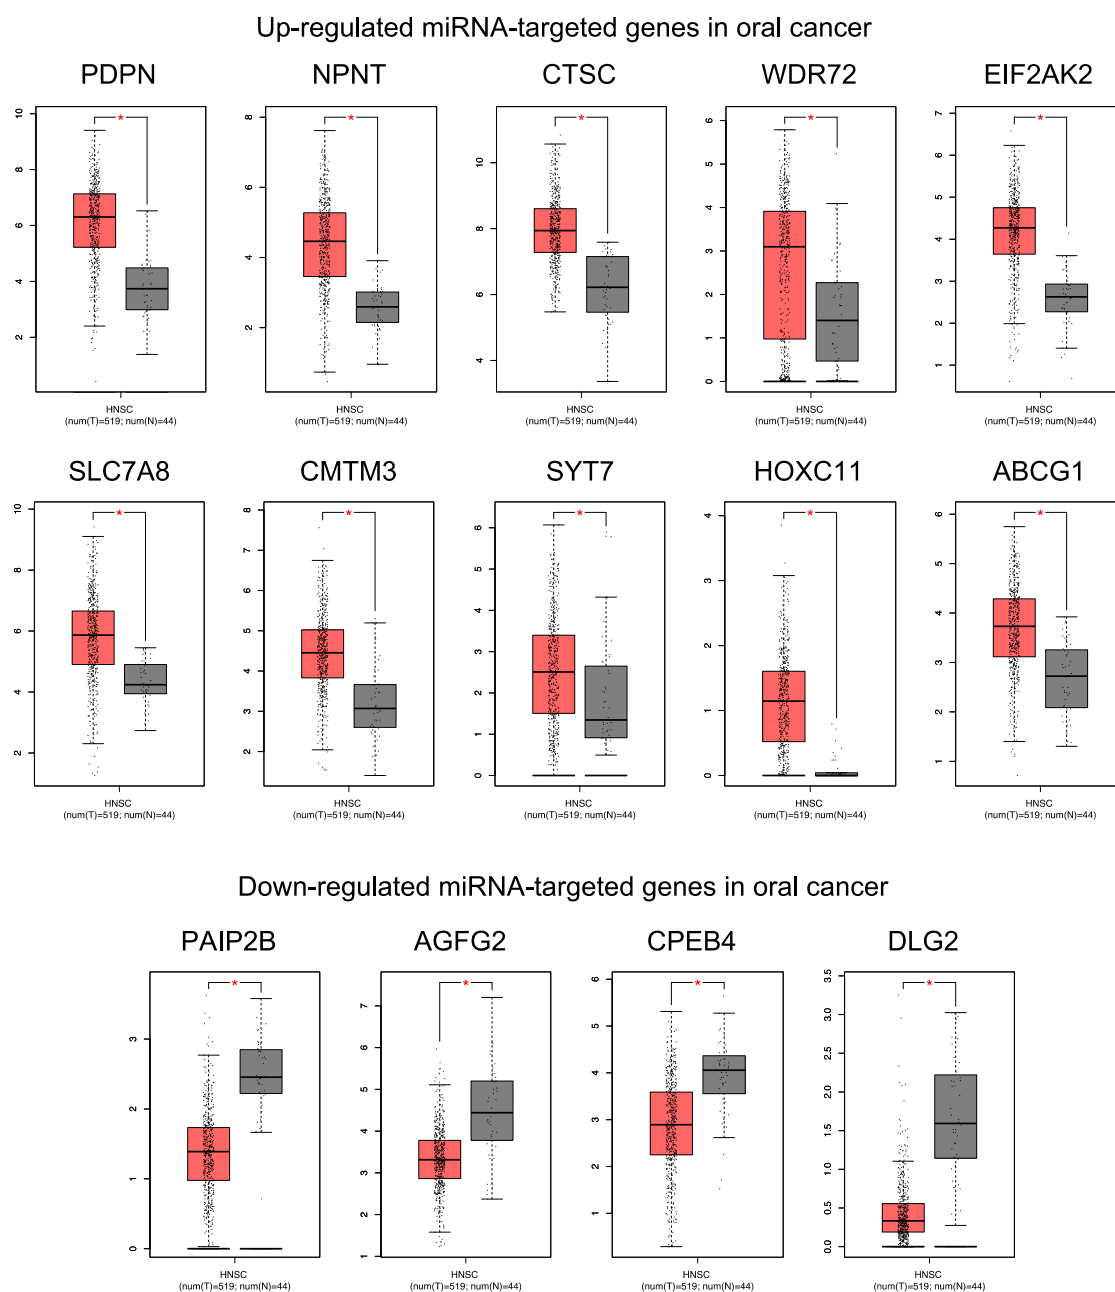

**Figure S4.** GEPIA analysis of the miRNA-targeted genes differentially expressed between oral cancer and healthy donors.

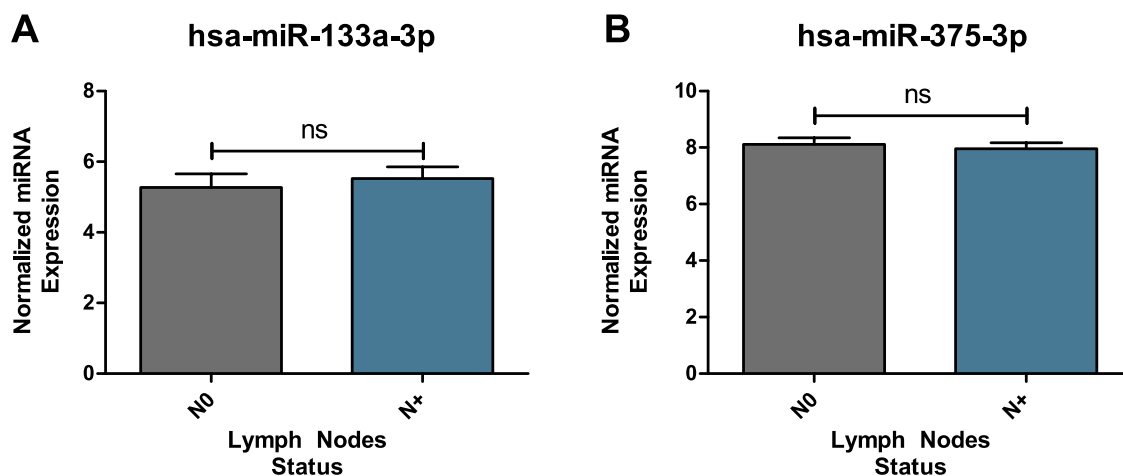

**Figure S5.** Panel A) No statistical difference observed for hsa-miR-133a-3p expression between oral cancer patients with positive lymph nodes and oral cancer patients without lymph nodes involvement according to the TCGA HNSC data; Panel B) No statistical difference observed for hsa-miR-375-3p expression between oral cancer patients with positive lymph nodes and oral cancer patients without lymph nodes involvement according to the TCGA HNSC data.

**Publisher's Note:** MDPI stays neutral with regard to jurisdictional claims in published maps and institutional affiliations.

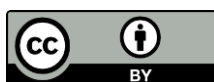

© 2020 by the authors. Licensee MDPI, Basel, Switzerland. This article is an open access article distributed under the terms and conditions of the Creative Commons Attribution (CC BY) license (<http://creativecommons.org/licenses/by/4.0/>).
